# Supplementary material for: A light-induced photochromic nanoswitch capable of non-destructive readout via fluorescence emission: cluster vs. single-molecule excitation of dihydroindolizines
Source: Royal Society of Chemistry journal article supplement (doi:10.1039/b905956c), 2009-07-09
Supplement: b905956c.pdf [file b905956c.pdf]

## A Light-Induced Photochromic Nanoswitch Capable of Non-Destructive Readout via Fluorescence Emission: Cluster vs. Single-Molecule Excitation of Dihydroindolizines

Thomas Hartmann<sup>a)</sup>, Tej. B. Shrestha<sup>b)</sup>, Stefan H. Bossmann<sup>b)\*</sup>, Christian Hübner<sup>c)</sup>, Alois Renn<sup>d)</sup> and Heinz Dürr<sup>a)\*</sup>

<sup>a</sup> FR 8.12 Organische Chemie, Universität des Saarlandes, 66041 Saarbrücken, Germany, heinz-duerr@t-online.de

<sup>b</sup> Kansas State University, Department of Chemistry, 111 Willard Hall, Manhattan, KS 66506-3701, USA, Fax: 001-785-532-6666; Tel: 001-785-532-6817; sbossman@ksu.edu

<sup>c</sup> Institut für Physik, Universität zu Lübeck, 23538 Lübeck, Ratzeburger Allee 160, Germany, huebner@physik.uni-luebeck.de

<sup>d</sup> ETH-Zentrum, Universitätsstrasse 22, Laboratorium für Physikalische Chemie, CH-8092 Zürich, Switzerland, alois.renn@phys.chem.ethz.ch

### Supplementary Information

#### Synthesis

Dimethyl-1',10'-a-dihydro-9'-(trans-2-[4''N,N-dimethylphenyl]-ethenyl)-spiro[9-H-fluorene-9,1'-pyrrolo-[1,2-a]quinoline]-2',3-dicarboxylate ((DHI (1)).

Dimethyl-cyclopropeno-fluorene-dicarboxylate (0.306g, 1.0 mmol)<sup>1</sup> was dissolved in 50 mL of anhydrous diethyl ether. To this mixture, dimethyl-styryl-quinoline (CAS: Benzenamine, N,N-dimethyl-4-[(1E)-2-(4-quinolinyl)ethenyl]-)<sup>2</sup> (0.274g, 1.0 mmol) was added as a quickly dissolving solid. The mixture was stirred in the dark and under Ar for 48h at RT. Reaction progress was monitored by thin layer chromatography (SiO<sub>2</sub>/CH<sub>2</sub>Cl<sub>2</sub>, R<sub>f</sub> ((DHI (1)) = 0.21). After the completion of the addition reaction, the solvent was removed in vacuum at RT. The yellowish reaction mixture was separated by descending column chromatography in the dark (50 x 2.5 cm, eluent: CH<sub>2</sub>Cl<sub>2</sub>, stationary phase: silica gel). The reaction product was further purified by recrystallization from diethyl ether.

Yield: 0.240 g (41.5%) of yellow crystals, mp: 167°C

#### UV/Vis:

DHI (1) c=1.65 x 10<sup>-4</sup> M, T=283K

PMMA: λ<sub>max</sub> (log ε): 262 nm (4.72), 354 nm (4.12)

CH<sub>2</sub>Cl<sub>2</sub>: λ<sub>max</sub> (log ε): 265 nm (4.87), 355 nm (4.22)

EtOH: λ<sub>max</sub> (log ε): 269 nm (4.94), 354 nm (4.18)

Note that the solvent effects on the UV-absorption of the DHI (1) are minimal.

Betaine (2) c<sub>(DHI + Betaine)</sub> = c=1.65 x 10<sup>-4</sup> M, photostationary state at 283K: approx. 45 %

PMMA: λ<sub>max</sub> (log ε): 620 nm (4.32)

CH<sub>2</sub>Cl<sub>2</sub>: λ<sub>max</sub> (log ε): 473 nm (4.21), 540 nm (4.22), 745 (3.97)

EtOH: λ<sub>max</sub> (log ε): 465 nm (4.16), 527 nm (4.32), 730 (3.94)

The absorption coefficients (M<sup>-1</sup> cm<sup>-1</sup>) were calculated based on the conversion efficiency when reaching the photostationary state. The DHI (1) does not show any absorption beyond 460nm.

<sup>1</sup> T. Shrestha, J. Melin, J. Liu, O. Dolgounitcheva, V. G. Zakrzewski, M. R. Pokhrel, E. Gogritchiani, J. V. Ortiz, C. Turró, S. H. Bossmann, New Insights in the Photochromic Spirodihydroindolizine/Betaine-System, *Photochem. Photobiol. Sci.*, 2008, **7**, 1449-1456.

<sup>2</sup> S.-L. Wang, T.-I. Ho, Substituent effects on intramolecular charge-transfer behavior of styrylheterocycles., *J. Photochem. Photobiol. A: Chem*, 2000, **135**, 119-126.

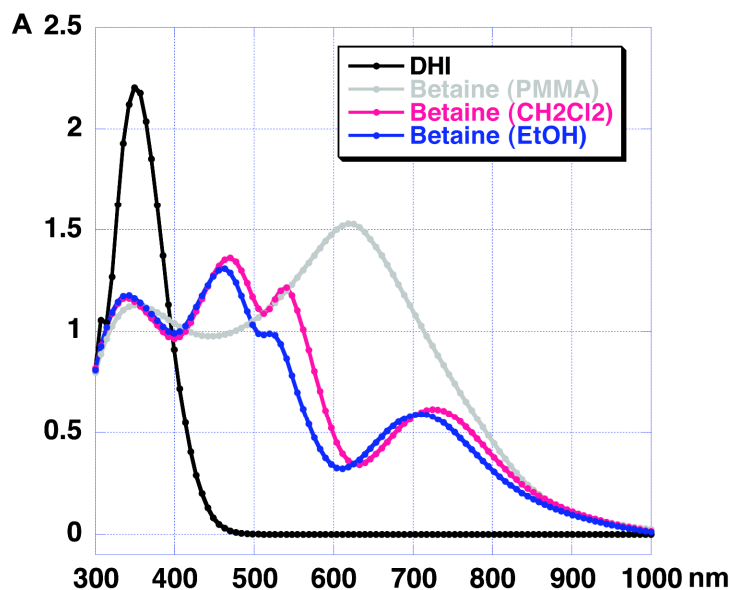

**Figure SI\_1:** UV/Vis-Absorption Spectra of DHI (1, black line) in  $\text{CH}_2\text{Cl}_2$   $c=1.65 \times 10^{-4}$  M,  $T=283\text{K}$  and mixtures of DHI (1) and Betaine (2) in PMMA,  $\text{CH}_2\text{Cl}_2$  and EtOH. The photostationary state at  $T=283\text{K}$  consists of approx.  $55\pm 3\%$  DHI and  $45\pm 3\%$  Betaine.

**IR:**  $\nu = 3055, 3010, 2980, 2825, 1735, 1685, 1590, 1495, 1445, 1265, 1210, 1155, 1100, 1015, 820, 725 \text{ cm}^{-1}$

**$^1\text{H-NMR}$**  ( $\text{CDCl}_3$ )  $\delta$  [ppm]: 7.74-7.72 (d,  $J=7.6$  Hz, 1H), 7.66-7.64 (d,  $J=7.5$  Hz, 1H), 7.40-7.38 (d,  $J=7.5$  Hz, 2H), 7.32-7.30 (m, 2H), 7.10-7.00 (m, 6H), 6.80-6.78 (m, 4H), 6.78-6.76 (m, 1H), 6.59-6.56 (d,  $J=15.6$  Hz, 1H), 6.38-6.35 (d,  $J=15.6$  Hz, 1H), 5.41-5.40 (d,  $J=0.9$  Hz, 1H), 5.02-5.01 (d,  $J=0.9$  Hz, 1H), 4.04 (s, 3H), 3.23 (s, 3H), 2.93 (s, 6H)

**$^{13}\text{C-NMR}$**  ( $\text{CDCl}_3$ )  $\delta$  [ppm]: 162.82, 162.61, 148.69, 144.33, 141.42, 140.31, 130.09, 127.75, 127.54, 127.32, 127.10, 126.65, 126.35, 124.97, 124.33, 123.55, 122.28, 121.53, 120.12, 119.06, 118.90, 114.98, 68.37, 62.09, 53.58, 51.04, 40.01

**MS:** (120 eV, CI,  $\text{CH}_4$ ):  $m/z$  (%) = 581 (7.4) ( $\text{M}^++1$ ), 580 (52.3) ( $\text{M}^+$ ), 273 (3.7)

**Elemental Analysis:**  $\text{C}_{38}\text{H}_{32}\text{N}_2\text{O}_4$ , calc. C 78.60 H 5.55 N 4.82; found C 78.51 H 5.51 N 4.73

#### **Interpolation of the $E_T(30)$ values of MMA and PMMA**

The  $E_T(30)$  values for various solvents shown in were obtained from the literature.<sup>3</sup> The data for the determination of the  $E_T(30)$  values for MMA and PMMA were obtained from the Ph. D. thesis of Dr. Frahn, who has measured  $\lambda_{\text{max}}$  of the solvatochromic dye 1-Naphthalene-carbonitrile, 4-[[1-[4-(2,5-dihydro-2,5-dioxo-1H-pyrrol-1-yl)phenyl]-4-piperidinylidene] methyl]- in various media.<sup>4</sup> Figure SI\_2 shows the linear correlations that were obtained from plots of  $\lambda_{\text{max}}$  and the corresponding excited state energies in eV vs.  $E_T(30)$  (empirical parameters of solvent polarity).<sup>3</sup>

<sup>3</sup> C. Reichardt, Solvatochromic Dyes as Solvent Polarity Indicators, *Chem. Rev.*, 1994, **94**, 2319-2358.

<sup>4</sup> M. S. Frahn, Radiation-Induced Poly M. S. Frahn, Radiation-Induced Polymerization Monitored with Fluorogenic Molecular Probes, *Ph.D. thesis*, Technische Universiteit Delft, The Netherlands, 2003, page 138.

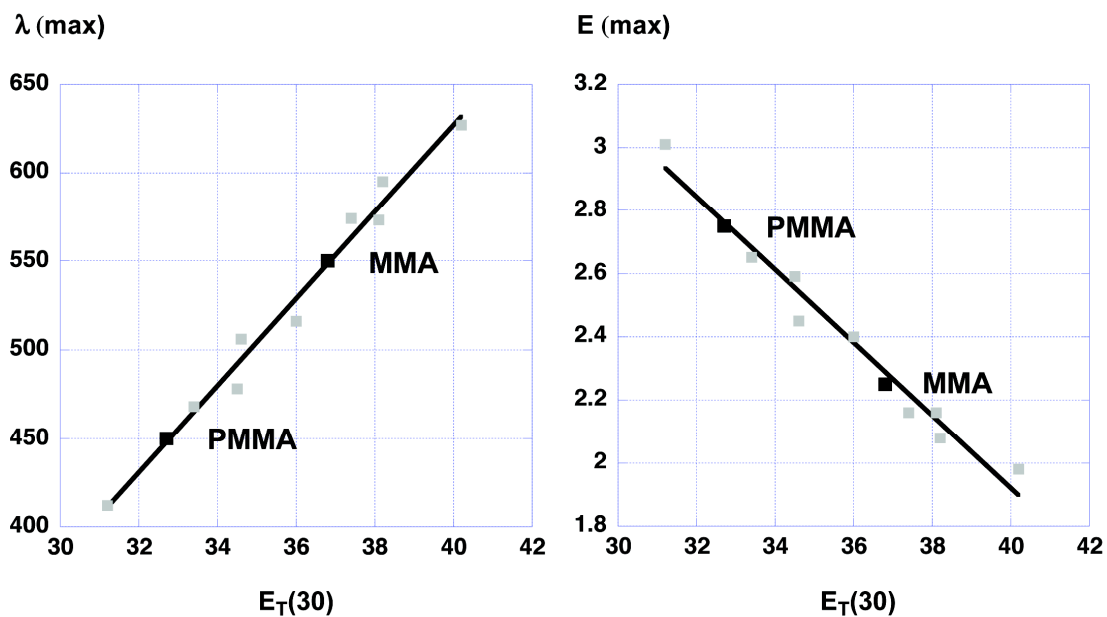

**Figure SI\_2:** Linear correlations that were obtained from plots of  $\lambda_{\max}$  and the corresponding excited state energies in eV of the solvatochromic dye MFP in various media<sup>4</sup> vs.  $E_T(30)$ . The linear fits permit the determination of  $E_T(30) = 32.7$  (kcal mol<sup>-1</sup>) for PMMA and  $E_T(30) = 36.8$  (kcal mol<sup>-1</sup>) for MMA.
